# Supplementary material
Source: PubMed Central journal article supplement (PMC5457284)
Supplement: NIHMS857504-supplement-Appendix.pdf [file NIHMS857504-supplement-Appendix.pdf]

## Appendix

### Appendix 1a: Analytic Methods

Risk factors were obtained for each encounter from emergency department or hospital claims extending 12 months prior to and including the index admission. We excluded encounters that occurred in hospitals with invalid identifiers, if the lengths of stay exceeded one year, had conflicting dates (e.g. the discharge date preceded the admission date, or multiple encounters overlapped for a unique patient), or did not have at least 90 days of post-discharge information. Minor analytic modifications were necessary to accommodate data structure differences between HCUP and CMS; comorbidity variables were derived from ICD-9-CM diagnosis codes from all hospital inpatient and emergency department encounters occurring within the previous 365 days, and we included a categorical variable for discharge year. SAS 9.4 (SAS Institute Inc., Cary, NC) was used for all data management and analysis.

### Appendix 1b: Statistical Methods: Intracluster Correlation Coefficient to Estimate the Hospital Quality Signal

Although the Intra-Cluster Correlation Coefficient is routinely used in the design and analysis of cluster randomized trials, we have extended its interpretation to examine how much of the readmission risk is correlated with the hospital. Applying the same mathematical foundation, the ICC represents how much readmission variation arises from the hospital (effect of the cluster) divided by the total variation arising from the hospital plus all other drivers of readmission variation (e.g. patient factors, pre/post hospital risk, unmeasured confounding).

The estimated ICC, established for binary outcomes, is given by

$$\widehat{ICC} = \frac{\hat{\sigma}_h^2}{\hat{\sigma}_h^2 + (\pi^2/3)}$$

where  $\hat{\sigma}_h^2$  is the estimated variation arising from the hospital cluster,  $(\pi^2/3)$  represents the variance from a standard logistic distribution, and the constant  $\pi$  equals 3.14159. (1-3)

**Appendix 2a: Risk variables used for clinical conditions in the acute myocardial infarction measure.**

| <b>n</b>       | <b>(%)</b> | <b>Risk Variables For Clinical Conditions</b>                                                              |
|----------------|------------|------------------------------------------------------------------------------------------------------------|
| <b>312,827</b> | 84.0       | Coronary atherosclerosis (CC 84)                                                                           |
| <b>151,165</b> | 40.6       | Diabetes mellitus (DM) or DM complications (CC 15-20, 119-120)                                             |
| <b>146,964</b> | 39.5       | Iron deficiency or other unspecified anemias and blood disease (CC 47)                                     |
| <b>94,835</b>  | 25.5       | Chronic obstructive pulmonary disease (COPD) (CC 108)                                                      |
| <b>86,642</b>  | 23.3       | Acute coronary syndrome (CC 81-82)                                                                         |
| <b>85,973</b>  | 23.1       | Valvular or rheumatic heart disease (CC 86)                                                                |
| <b>83,572</b>  | 22.5       | Angina pectoris/old myocardial infarction (CC 83)                                                          |
| <b>82,076</b>  | 22.1       | Congestive heart failure (CC 80)                                                                           |
| <b>78,076</b>  | 21.0       | Specified arrhythmias and other heart rhythm disorders (CC 92- 93)                                         |
| <b>71,037</b>  | 19.1       | Disorders of fluid/electrolyte/acid-base (CC 22-23)                                                        |
| <b>62,637</b>  | 16.8       | Renal failure (CC 131)                                                                                     |
| <b>58,832</b>  | 15.8       | Pneumonia (CC 111-113)                                                                                     |
| <b>56,989</b>  | 15.3       | Vascular or circulatory disease (CC 104-106)                                                               |
| <b>53,857</b>  | 14.5       | Dementia or other specified brain disorders (CC 49-50)                                                     |
| <b>50,310</b>  | 13.5       | History of Percutaneous Transluminal Coronary Angioplasty (PTCA) (ICD-9 codes V45.82, 00.66, 36.06, 36.07) |
| <b>50,299</b>  | 13.5       | Other urinary tract disorders (CC 136)                                                                     |
| <b>46,058</b>  | 12.4       | Other location of myocardial infarction (ICD-9 codes 410.20-410.62)                                        |
| <b>42,818</b>  | 11.5       | History of Coronary Artery Bypass Graft (CABG) surgery (ICD-9 codes V45.81, 36.10-36.16)                   |
| <b>40,386</b>  | 10.9       | Anterior myocardial infarction (ICD-9 codes 410.00-410.12)                                                 |
| <b>29,151</b>  | 7.8        | Cancer (CC 8-12)                                                                                           |
| <b>25,785</b>  | 6.9        | History of infection (CC 1, 3-6)                                                                           |
| <b>24,828</b>  | 6.7        | Cerebrovascular disease (CC 97-99, 103)                                                                    |
| <b>16,483</b>  | 4.4        | Protein-calorie malnutrition (CC 21)                                                                       |
| <b>15,052</b>  | 4.0        | Asthma (CC 110)                                                                                            |
| <b>14,556</b>  | 3.9        | Hemiplegia, paraplegia, paralysis, functional disability (CC 67-69, 100- 102, 177-178)                     |

|               |     |                                                    |
|---------------|-----|----------------------------------------------------|
| <b>13,071</b> | 3.5 | Decubitus ulcer or chronic skin ulcer (CC 148-149) |
| <b>7,635</b>  | 2.1 | Stroke (CC 95-96)                                  |
| <b>7,248</b>  | 1.9 | End-stage renal disease or dialysis (CC 129-130)   |
| <b>5,960</b>  | 1.6 | Metastatic cancer or acute leukemia (CC 7)         |

**Appendix 2b: Risk variables used for clinical conditions in the heart failure measure.**

| <b>n</b>       | <b>(%)</b> | <b>Risk Variables For Clinical Conditions</b>                                    |
|----------------|------------|----------------------------------------------------------------------------------|
| <b>656,041</b> | 71.2       | Coronary atherosclerosis or angina (CC 83-84)                                    |
| <b>534,310</b> | 58.0       | Congestive heart failure (CC 80)                                                 |
| <b>479,533</b> | 52.0       | Iron deficiency or other unspecified anemias and blood disease (CC 47)           |
| <b>450,538</b> | 48.9       | Diabetes mellitus (DM) or DM complications (CC 15-20, 119-120)                   |
| <b>420,811</b> | 45.7       | Specified arrhythmias and other heart rhythm disorders (CC 92-93)                |
| <b>405,707</b> | 44.0       | Other gastrointestinal disorders (CC 36)                                         |
| <b>397,743</b> | 43.2       | Chronic obstructive pulmonary disease (COPD) (CC 108)                            |
| <b>360,628</b> | 39.1       | Valvular or rheumatic heart disease (CC 86)                                      |
| <b>337,560</b> | 36.6       | Disorders of fluid/electrolyte/acid-base (CC 22-23)                              |
| <b>337,017</b> | 36.6       | Renal failure (CC 131)                                                           |
| <b>271,897</b> | 29.5       | Pneumonia (CC 111-113)                                                           |
| <b>248,986</b> | 27.0       | Vascular or circulatory disease (CC 104-106)                                     |
| <b>190,668</b> | 20.7       | History of Coronary Artery Bypass Graft (CABG) (ICD-9 codes V45.81, 36.10-36.16) |
| <b>189,226</b> | 20.5       | Other urinary tract disorders (CC 136)                                           |
| <b>162,881</b> | 17.7       | Dementia or other specified brain disorders (CC 49-50)                           |
| <b>145,734</b> | 15.8       | Cardio-respiratory failure or shock (CC 79)                                      |
| <b>136,523</b> | 14.8       | Depression (CC 58)                                                               |
| <b>120,423</b> | 13.1       | Acute coronary syndrome (CC 81-82)                                               |
| <b>104,631</b> | 11.4       | Drug/alcohol abuse/dependence/psychosis (CC 51-53)                               |
| <b>93,170</b>  | 10.1       | Peptic ulcer, hemorrhage, other specified gastrointestinal disorders (CC 34)     |
| <b>91,377</b>  | 9.9        | Cancer (CC 8-12)                                                                 |
| <b>90,219</b>  | 9.8        | Other psychiatric disorders (CC 60)                                              |
| <b>84,038</b>  | 9.1        | Other or unspecified heart disease (CC 94)                                       |
| <b>74,521</b>  | 8.1        | Decubitus ulcer or chronic skin ulcer (CC 148-149)                               |
| <b>64,466</b>  | 7.0        | Protein-calorie malnutrition (CC 21)                                             |
| <b>63,000</b>  | 6.8        | Liver or biliary disease (CC 25-30)                                              |

|               |     |                                                                                        |
|---------------|-----|----------------------------------------------------------------------------------------|
| <b>57,406</b> | 6.2 | Asthma (CC 110)                                                                        |
| <b>52,751</b> | 5.7 | Hemiplegia, paraplegia, paralysis, functional disability (CC 67-69, 100- 102, 177-178) |
| <b>50,329</b> | 5.5 | Fibrosis of lung or other chronic lung disorders (CC 109)                              |
| <b>43,757</b> | 4.7 | Major psychiatric disorders (CC 54-56)                                                 |
| <b>38,232</b> | 4.1 | Nephritis (CC 132)                                                                     |
| <b>35,159</b> | 3.8 | End-stage renal disease or dialysis (CC 129-130)                                       |
| <b>25,429</b> | 2.8 | Severe hematological disorders (CC 44)                                                 |
| <b>24,485</b> | 2.7 | Stroke (CC 95-96)                                                                      |
| <b>14,194</b> | 1.5 | Metastatic cancer or acute leukemia (CC 7)                                             |

**Appendix 2c: Risk variables used for clinical conditions in the pneumonia measure.**

| <b>n</b>       | <b>(%)</b> | <b>Risk Variables For Clinical Conditions</b>                                    |
|----------------|------------|----------------------------------------------------------------------------------|
| <b>332,722</b> | 50.1       | Pneumonia (CC 111-113)                                                           |
| <b>324,573</b> | 48.9       | Chronic obstructive pulmonary disease (COPD) (CC 108)                            |
| <b>307,034</b> | 46.3       | Iron deficiency or other unspecified anemias and blood disease (CC 47)           |
| <b>304,249</b> | 45.8       | Other gastrointestinal disorders (CC 36)                                         |
| <b>273,813</b> | 41.3       | Coronary atherosclerosis or angina (CC 83-84)                                    |
| <b>229,983</b> | 34.6       | Diabetes mellitus (DM) or DM complications (CC 15-19, 119-120)                   |
| <b>193,844</b> | 29.2       | Disorders of fluid/electrolyte/acid-base (CC 22-23)                              |
| <b>166,167</b> | 25.0       | Dementia or other specified brain disorders (CC 49-50)                           |
| <b>161,199</b> | 24.3       | Specified arrhythmias and other heart rhythm disorders (CC 92-93)                |
| <b>154,874</b> | 23.3       | Congestive heart failure (CC 80)                                                 |
| <b>130,074</b> | 19.6       | Other lung disorders (CC 115)                                                    |
| <b>116,726</b> | 17.6       | Renal failure (CC 131)                                                           |
| <b>112,807</b> | 17.0       | Vascular or circulatory disease (CC 104-106)                                     |
| <b>105,748</b> | 15.9       | Urinary tract infection (CC 135)                                                 |
| <b>96,973</b>  | 14.6       | History of infection (CC 1, 3-6)                                                 |
| <b>96,178</b>  | 14.5       | Lung, upper digestive tract, and other severe cancers (CC 8)                     |
| <b>96,078</b>  | 14.5       | Other injuries (CC 162)                                                          |
| <b>94,034</b>  | 14.2       | Other urinary tract disorders (CC 136)                                           |
| <b>87,784</b>  | 13.2       | Valvular or rheumatic heart disease (CC 86)                                      |
| <b>85,691</b>  | 12.9       | Drug/alcohol abuse/dependence/psychosis (CC 51-53)                               |
| <b>83,202</b>  | 12.5       | Cardio-respiratory failure or shock (CC 79)                                      |
| <b>69,440</b>  | 10.5       | Protein-calorie malnutrition (CC 21)                                             |
| <b>65,571</b>  | 9.9        | Other psychiatric disorders (CC 60)                                              |
| <b>62,373</b>  | 9.4        | Fibrosis of lung or other chronic lung disorders (CC 109)                        |
| <b>60,408</b>  | 9.1        | History of Coronary Artery Bypass Graft (CABG) (ICD-9 codes V45.81, 36.10-36.16) |
| <b>59,102</b>  | 8.9        | Other major cancers (CC 9-10)                                                    |

|               |     |                                                                                        |
|---------------|-----|----------------------------------------------------------------------------------------|
| <b>48,431</b> | 7.3 | Asthma (CC 110)                                                                        |
| <b>43,536</b> | 6.6 | Major psychiatric disorders (CC 54-56)                                                 |
| <b>43,515</b> | 6.6 | Decubitus ulcer or chronic skin ulcer (CC 148-149)                                     |
| <b>42,095</b> | 6.3 | Septicemia/shock (CC 2)                                                                |
| <b>37,205</b> | 5.6 | Hemiplegia, paraplegia, paralysis, functional disability (CC 67-69, 100- 102, 177-178) |
| <b>32,725</b> | 4.9 | Pleural effusion/pneumothorax (CC 114)                                                 |
| <b>30,183</b> | 4.5 | Acute coronary syndrome (CC 81-82)                                                     |
| <b>26,602</b> | 4.0 | Metastatic cancer or acute leukemia (CC 7)                                             |
| <b>18,938</b> | 2.9 | Severe hematological disorders (CC 44)                                                 |
| <b>18,662</b> | 2.8 | Vertebral fractures (CC 157)                                                           |
| <b>17,105</b> | 2.6 | Stroke (CC 95-96)                                                                      |
| <b>13,714</b> | 2.1 | End-stage renal disease or dialysis (CC 129-130)                                       |

**Appendix 2d: Risk variables used for clinical conditions in the hospital-wide readmission measure, for all cohorts.**

| <b>n</b>         | <b>(%)</b> | <b>Risk Variables For Clinical Conditions</b>                                              |
|------------------|------------|--------------------------------------------------------------------------------------------|
| <b>8,639,589</b> | 55.4       | Coronary atherosclerosis or angina, cerebrovascular disease (CC 81-84, 89, 98-99, 103-106) |
| <b>6,547,171</b> | 42.0       | Iron deficiency or other unspecified anemias and blood disease (CC 47)                     |
| <b>5,480,581</b> | 35.1       | Diabetes mellitus (DM) or DM complications (CC 15- 20, 119-120)                            |
| <b>4,194,685</b> | 26.9       | Chronic obstructive pulmonary disease (COPD) (CC 108)                                      |
| <b>3,931,251</b> | 25.2       | Disorders of fluid/electrolyte/acid-base (CC 22-23)                                        |
| <b>3,648,812</b> | 23.4       | Other infectious diseases and pneumonias (CC 6, 111-113)                                   |
| <b>3,629,020</b> | 23.3       | Psychiatric comorbidity (CC 54-56, 58, 60)                                                 |
| <b>3,492,584</b> | 22.4       | Specified arrhythmias and other heart rhythm disorders (CC 92-93)                          |
| <b>3,095,833</b> | 19.9       | Congestive heart failure (CC 80)                                                           |
| <b>2,671,607</b> | 17.1       | Renal failure (CC 131)                                                                     |
| <b>1,453,945</b> | 9.3        | Other cancers (CC 10-12)                                                                   |
| <b>1,198,910</b> | 7.7        | Cardio-respiratory failure or shock (CC 79)                                                |
| <b>1,145,625</b> | 7.3        | Protein-calorie malnutrition (CC 21)                                                       |
| <b>969,540</b>   | 6.2        | Decubitus ulcer or chronic skin ulcer (CC 148-149)                                         |
| <b>828,989</b>   | 5.3        | Hemiplegia, paraplegia, paralysis, functional disability (CC 67-69, 100-102, 177-178)      |
| <b>804,062</b>   | 5.2        | Severe cancer (CC 8-9)                                                                     |
| <b>762,360</b>   | 4.9        | Septicemia/shock (CC 2)                                                                    |
| <b>754,565</b>   | 4.8        | Coagulation defects and other specified hematological disorders (CC 46)                    |
| <b>673,931</b>   | 4.3        | Seizure disorders and convulsions (CC 74)                                                  |
| <b>658,204</b>   | 4.2        | Rheumatoid arthritis and inflammatory connective tissue disease (CC 38)                    |
| <b>566,351</b>   | 3.6        | Metastatic cancer or acute leukemia (CC 7)                                                 |
| <b>565,890</b>   | 3.6        | Fibrosis of lung or other chronic lung disorders (CC 109)                                  |
| <b>481,899</b>   | 3.1        | Drug/alcohol psychosis or dependence (CC 51-52)                                            |
| <b>410,316</b>   | 2.6        | Pancreatic disease (CC 32)                                                                 |
| <b>372,946</b>   | 2.4        | Hip fracture/dislocation (CC 158)                                                          |
| <b>346,885</b>   | 2.2        | Severe hematological disorders (CC 44)                                                     |



|                |     |                                                   |
|----------------|-----|---------------------------------------------------|
| <b>318,044</b> | 2.0 | Dialysis status (CC 130)                          |
| <b>293,157</b> | 1.9 | End-stage liver disease (CC 25-26)                |
| <b>228,683</b> | 1.5 | Severe infection (CC 1, 3-5)                      |
| <b>80,914</b>  | 0.5 | Respirator dependence/tracheostomy status (CC 77) |
| <b>66,105</b>  | 0.4 | Transplants (CC 128, 174)                         |

**Appendix 3: Characteristics of hospital encounters among acute myocardial infarction, heart failure, pneumonia and combined hospital-wide readmission cohorts.**

| <b>Characteristic</b>                                                  | <b>Acute Myocardial Infarction</b> | <b>Heart Failure</b> | <b>Pneumonia</b> | <b>Hospital-Wide Readmission</b> |
|------------------------------------------------------------------------|------------------------------------|----------------------|------------------|----------------------------------|
| <b>Race or ethnicity — %<sup>a</sup></b>                               |                                    |                      |                  |                                  |
| White                                                                  | 73.3                               | 68.4                 | 72.8             | 71.7                             |
| Black                                                                  | 6.3                                | 11.0                 | 6.3              | 8.3                              |
| Hispanic                                                               | 11.7                               | 13.2                 | 12.4             | 12.1                             |
| Asian or Pacific Islander                                              | 3.6                                | 3.5                  | 4.5              | 3.7                              |
| Native American                                                        | 0.2                                | 0.2                  | 0.2              | 0.2                              |
| Other                                                                  | 3.2                                | 2.3                  | 1.9              | 2.3                              |
| Missing                                                                | 1.9                                | 1.4                  | 1.8              | 1.7                              |
| <b>Primary payer — %<sup>a</sup></b>                                   |                                    |                      |                  |                                  |
| Medicare <sup>b</sup>                                                  | 89.1                               | 90.9                 | 90.4             | 89.7                             |
| Medicaid                                                               | 2.5                                | 3.0                  | 3.2              | 2.7                              |
| Private insurance                                                      | 6.8                                | 4.6                  | 5.1              | 6.1                              |
| Self-pay                                                               | 0.6                                | 0.5                  | 0.5              | 0.5                              |
| No charge                                                              | 0.1                                | 0.1                  | 0.1              | 0.1                              |
| Other                                                                  | 0.9                                | 0.9                  | 0.8              | 0.9                              |
| Not reported, missing                                                  | 0.0                                | 0.0                  | 0.0              | 0.0                              |
| <b>Rural-Urban Continuum Codes, 2003 — %<sup>c</sup></b>               |                                    |                      |                  |                                  |
| 1 (metro)                                                              | 67.2                               | 69.4                 | 66.5             | 68.9                             |
| 2                                                                      | 21.4                               | 19.7                 | 20.7             | 20.0                             |
| 3                                                                      | 4.7                                | 4.6                  | 5.5              | 4.8                              |
| 4                                                                      | 4.1                                | 3.6                  | 3.8              | 3.7                              |
| 5                                                                      | 0.3                                | 0.4                  | 0.7              | 0.5                              |
| 6                                                                      | 1.8                                | 1.9                  | 2.3              | 1.8                              |
| 7                                                                      | 0.3                                | 0.2                  | 0.4              | 0.3                              |
| 8                                                                      | 0.2                                | 0.2                  | 0.2              | 0.2                              |
| 9 (non-metro)                                                          | 0.1                                | 0.0                  | 0.0              | 0.0                              |
| <b>Median household income state quartile for patient ZIP Code — %</b> |                                    |                      |                  |                                  |
| Q1                                                                     | 25.3                               | 28.1                 | 26.0             | 25.4                             |
| Q2                                                                     | 26.6                               | 26.0                 | 26.7             | 25.9                             |
| Q3                                                                     | 25.5                               | 24.8                 | 25.4             | 25.5                             |
| Q4                                                                     | 22.6                               | 21.1                 | 21.9             | 23.3                             |

| <b>Characteristic</b>          | <b>Acute Myocardial Infarction</b> | <b>Heart Failure</b> | <b>Pneumonia</b> | <b>Hospital-Wide Readmission</b> |
|--------------------------------|------------------------------------|----------------------|------------------|----------------------------------|
| Hospital Type —% <sup>a</sup>  |                                    |                      |                  |                                  |
| Private < 100 beds             | 1.1                                | 1.9                  | 2.4              | 16.9                             |
| Private ≥ 100 beds             | 17.6                               | 17.7                 | 16.0             | 1.2                              |
| Non-profit, rural <100 beds    | 0.1                                | 1.2                  | 2.2              | 2.0                              |
| Non-profit, rural ≥100 beds    | 1.7                                | 2.2                  | 2.8              | 2.2                              |
| Non-profit, urban <100 beds    | 0.6                                | 2.1                  | 3.5              | 24.2                             |
| Non-profit, urban 100-299 beds | 20.6                               | 24.5                 | 28.2             | 45.6                             |
| Non-profit, urban ≥300 beds    | 52.2                               | 44.9                 | 39.8             | 5.8                              |
| Missing                        | 6.1                                | 5.5                  | 5.1              | 2.1                              |

<sup>a</sup> Not included in the models.

<sup>b</sup> Medicare Payer includes Medicare Advantage and Medicare Fee-for-Service and are not distinguished in the data.

- <sup>c</sup>
- 1: Metro - Counties in metro areas of 1 million population or more;
  - 2: Metro - Counties in metro areas of 250,000 to 1 million population;
  - 3: Metro - Counties in metro areas of fewer than 250,000 population;
  - 4: Non-Metro - Urban population of 20,000 or more, adjacent to a metro area;
  - 5: Non-Metro - Urban population of 20,000 or more, not adjacent to a metro area;
  - 6: Non-Metro - Urban population of 2,500 to 19,999, adjacent to a metro area;
  - 7: Non-Metro - Urban population of 2,500 to 19,999, not adjacent to a metro area;
  - 8: Non-Metro - Completely rural or less than 2,500 urban population, adjacent to a metro area;
  - 9: Non-Metro - Completely rural or less than 2,500 urban population, not adjacent to a metro area.

**Appendix 4: Readmission odds ratios (OR) for geodemographic factors at 3, 7, 30, 90 days, and 95% confidence intervals.**

| Effect                             | OR 3-days<br>(95% CI)* | p value | OR 7-days<br>(95% CI)* | p value | OR 30 days<br>(95% CI)* | p value | OR 90-days<br>(95% CI)* | p value |
|------------------------------------|------------------------|---------|------------------------|---------|-------------------------|---------|-------------------------|---------|
| <b>Acute myocardial infarction</b> |                        |         |                        |         |                         |         |                         |         |
| Rural urban continuum 9 vs. 1      | 0.88                   | 0.430   | 1.00                   | 0.981   | 2.34                    | 0.002   | 1.85                    | 0.001   |
| Income lowest vs. highest          | 1.05                   | 0.011   | 1.09                   | <0.001  | 1.11                    | <0.001  | 1.15                    | <0.001  |
| State 1 vs. State 4                | 0.75                   | <0.001  | 0.68                   | <0.001  | 0.62                    | <0.001  | 0.58                    | <0.001  |
| <b>Heart failure</b>               |                        |         |                        |         |                         |         |                         |         |
| Rural urban continuum 9 vs. 1      | 1.14                   | 0.607   | 1.22                   | 0.266   | 1.52                    | <0.001  | 2.26                    | <0.001  |
| Income lowest vs. highest          | 1.06                   | <0.001  | 1.07                   | <0.001  | 1.09                    | <0.001  | 1.14                    | <0.001  |
| State 1 vs. State 4                | 0.79                   | <0.001  | 0.73                   | <0.001  | 0.68                    | <0.001  | 0.6                     | <0.001  |
| <b>Pneumonia</b>                   |                        |         |                        |         |                         |         |                         |         |
| Rural urban continuum 9 vs. 1      | 1.51                   | 0.196   | 1.08                   | 0.691   | 1.41                    | 0.010   | 1.94                    | <0.001  |
| Income lowest vs. highest          | 1.04                   | 0.004   | 1.08                   | <0.001  | 1.13                    | <0.001  | 1.19                    | <0.001  |
| State 1 vs. State 4                | 0.83                   | <0.001  | 0.83                   | <0.001  | 0.74                    | <0.001  | 0.67                    | <0.001  |
| <b>Medicine</b>                    |                        |         |                        |         |                         |         |                         |         |
| Rural urban continuum 9 vs. 1      | 2.64                   | 0.173   | 1.19                   | 0.612   | 1.99                    | 0.015   | 2.27                    | <0.001  |
| Income lowest vs. highest          | 1.06                   | 0.044   | 1.09                   | <0.001  | 1.13                    | <0.001  | 1.19                    | <0.001  |
| State 1 vs. State 4                | 0.91                   | 0.204   | 0.89                   | 0.029   | 0.75                    | <0.001  | 0.66                    | <0.001  |
| <b>Surgery</b>                     |                        |         |                        |         |                         |         |                         |         |
| Rural urban continuum 9 vs. 1      | 1.19                   | 0.705   | 1.77                   | 0.114   | 1.74                    | 0.009   | 2.77                    | <0.001  |
| Income lowest vs. highest          | 1.01                   | 0.423   | 1.05                   | <0.001  | 1.1                     | <0.001  | 1.15                    | <0.001  |
| State 1 vs. State 4                | 0.78                   | <0.001  | 0.75                   | <0.001  | 0.7                     | <0.001  | 0.62                    | <0.001  |
| <b>Neurology</b>                   |                        |         |                        |         |                         |         |                         |         |
| Rural urban continuum 9 vs. 1      | 2.53                   | 0.191   | 1.6                    | 0.221   | 1.5                     | 0.078   | 1.99                    | <0.001  |
| Income lowest vs. highest          | 1.08                   | 0.001   | 1.08                   | <0.001  | 1.09                    | <0.001  | 1.13                    | <0.001  |
| State 1 vs. State 4                | 0.85                   | 0.006   | 0.8                    | <0.001  | 0.75                    | <0.001  | 0.67                    | <0.001  |
| <b>Cardiorespiratory</b>           |                        |         |                        |         |                         |         |                         |         |
| Rural urban continuum 9 vs. 1      | 1.10                   | 0.610   | 1.02                   | 0.899   | 1.46                    | <0.001  | 1.75                    | <0.001  |
| Income lowest vs. highest          | 1.10                   | 0.649   | 1.03                   | <0.001  | 1.06                    | <0.001  | 1.10                    | <0.001  |
| State 1 vs. State 4                | 0.77                   | <0.001  | 0.71                   | <0.001  | 0.66                    | <0.001  | 0.60                    | <0.001  |
| <b>Cardiovascular</b>              |                        |         |                        |         |                         |         |                         |         |
| Rural urban continuum 9 vs. 1      | 1.71                   | 0.034   | 1.59                   | 0.006   | 1.98                    | <0.001  | 2.28                    | <0.001  |
| Income lowest vs. highest          | 1.05                   | <0.001  | 1.06                   | <0.001  | 1.1                     | <0.001  | 1.13                    | <0.001  |
| State 1 vs. State 4                | 0.86                   | <0.001  | 0.83                   | <0.001  | 0.76                    | <0.001  | 0.69                    | <0.001  |

**Appendix 5: State-level stratified Intracluster correlation coefficient estimates**

| <b>State</b>                                | <b>Acute Myocardial Infarction*</b> | <b>Heart Failure</b> | <b>Pneumonia</b> |
|---------------------------------------------|-------------------------------------|----------------------|------------------|
| <b>Intracluster Correlation Coefficient</b> |                                     |                      |                  |
| <b>Readmission Day 7</b>                    |                                     |                      |                  |
| Arizona                                     | 3.58                                | 3.47                 | 2.19             |
| California                                  | 0.49                                | 0.53                 | 0.52             |
| Florida                                     | 0.49                                | 0.79                 | 0.57             |
| New York                                    | 0.39                                | 0.69                 | 0.74             |
| <b>Readmission Day 30</b>                   |                                     |                      |                  |
| Arizona                                     | 4.11                                | 4.15                 | 4.60             |
| California                                  | 0.78                                | 0.57                 | 0.53             |
| New York                                    | 0.62                                | 0.72                 | 0.58             |
| Florida                                     | 0.68                                | 0.78                 | 0.82             |

Note: Readmission cohorts were stratified by state to examine between state hospital quality signal differences.

Appendix 6a: Standardized readmission ratio difference, readmission on day 7 versus 30 for acute myocardial infarction stratified by state.

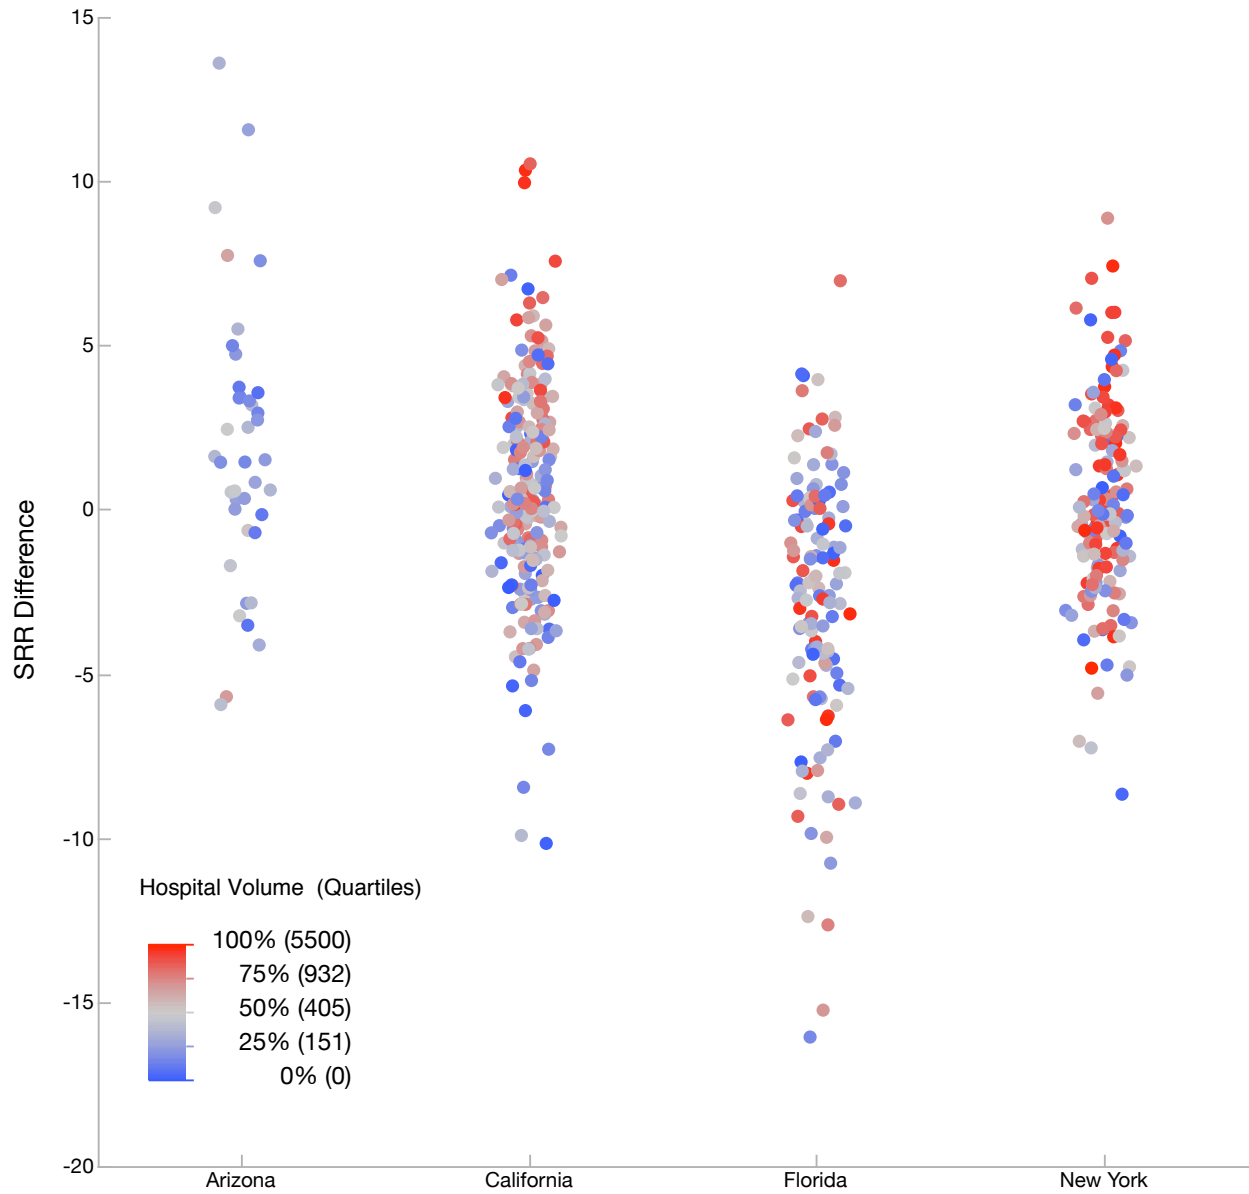

Appendix 6b: Standardized readmission ratio difference, readmission on day 7 versus 30 for heart failure stratified by state.

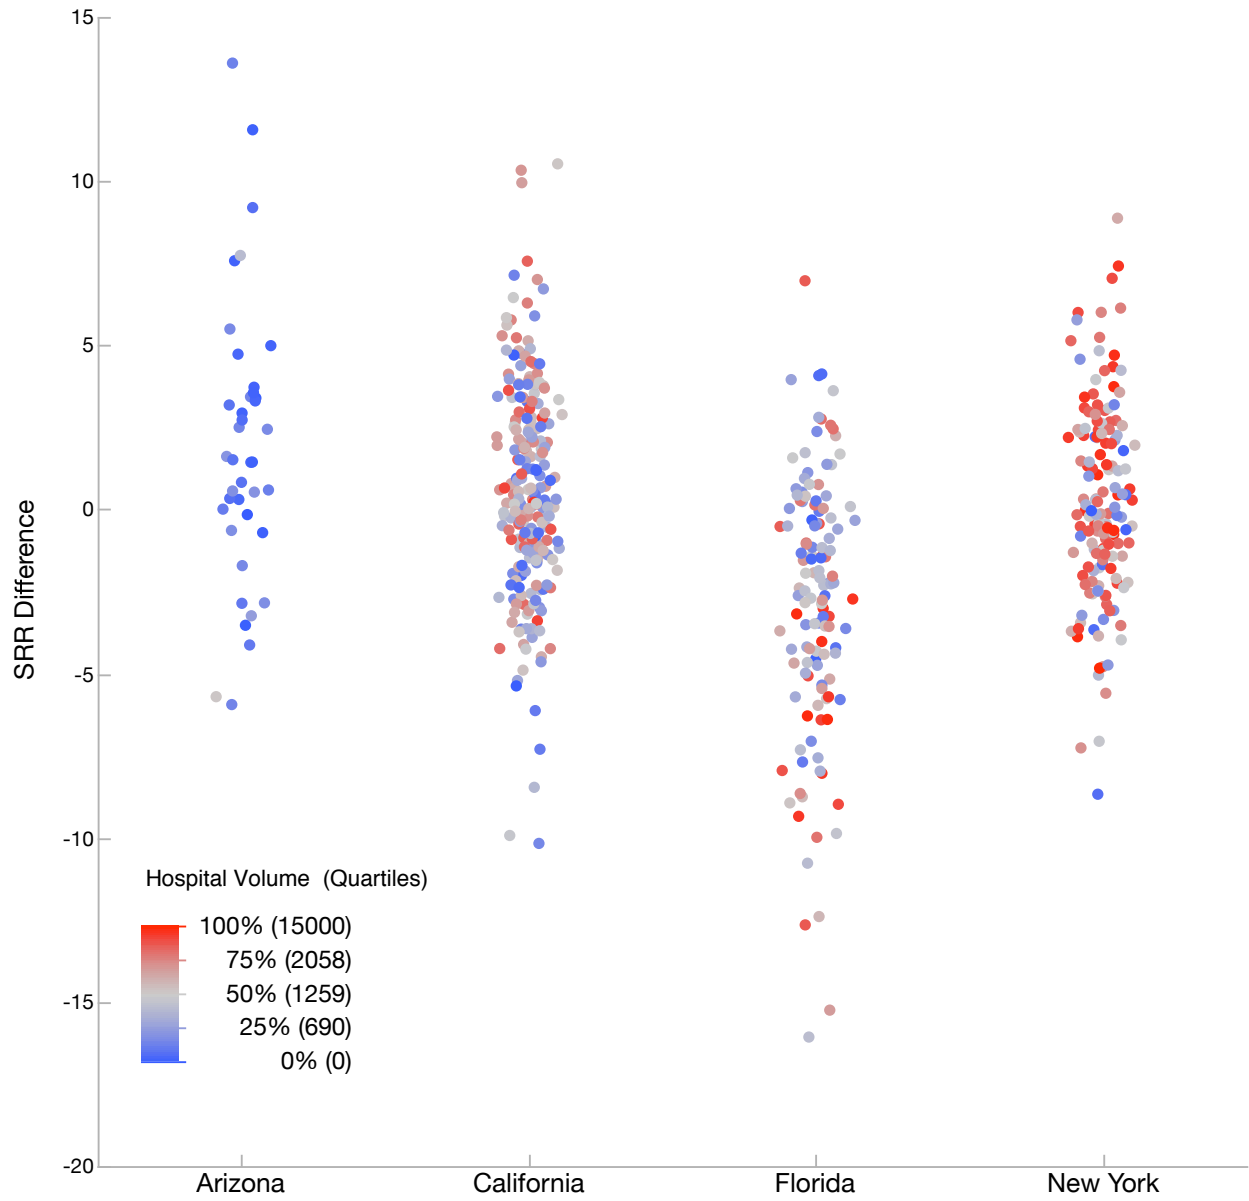

Appendix 6c: Standardized readmission ratio difference, readmission on day 7 versus 30 for pneumonia stratified by state.

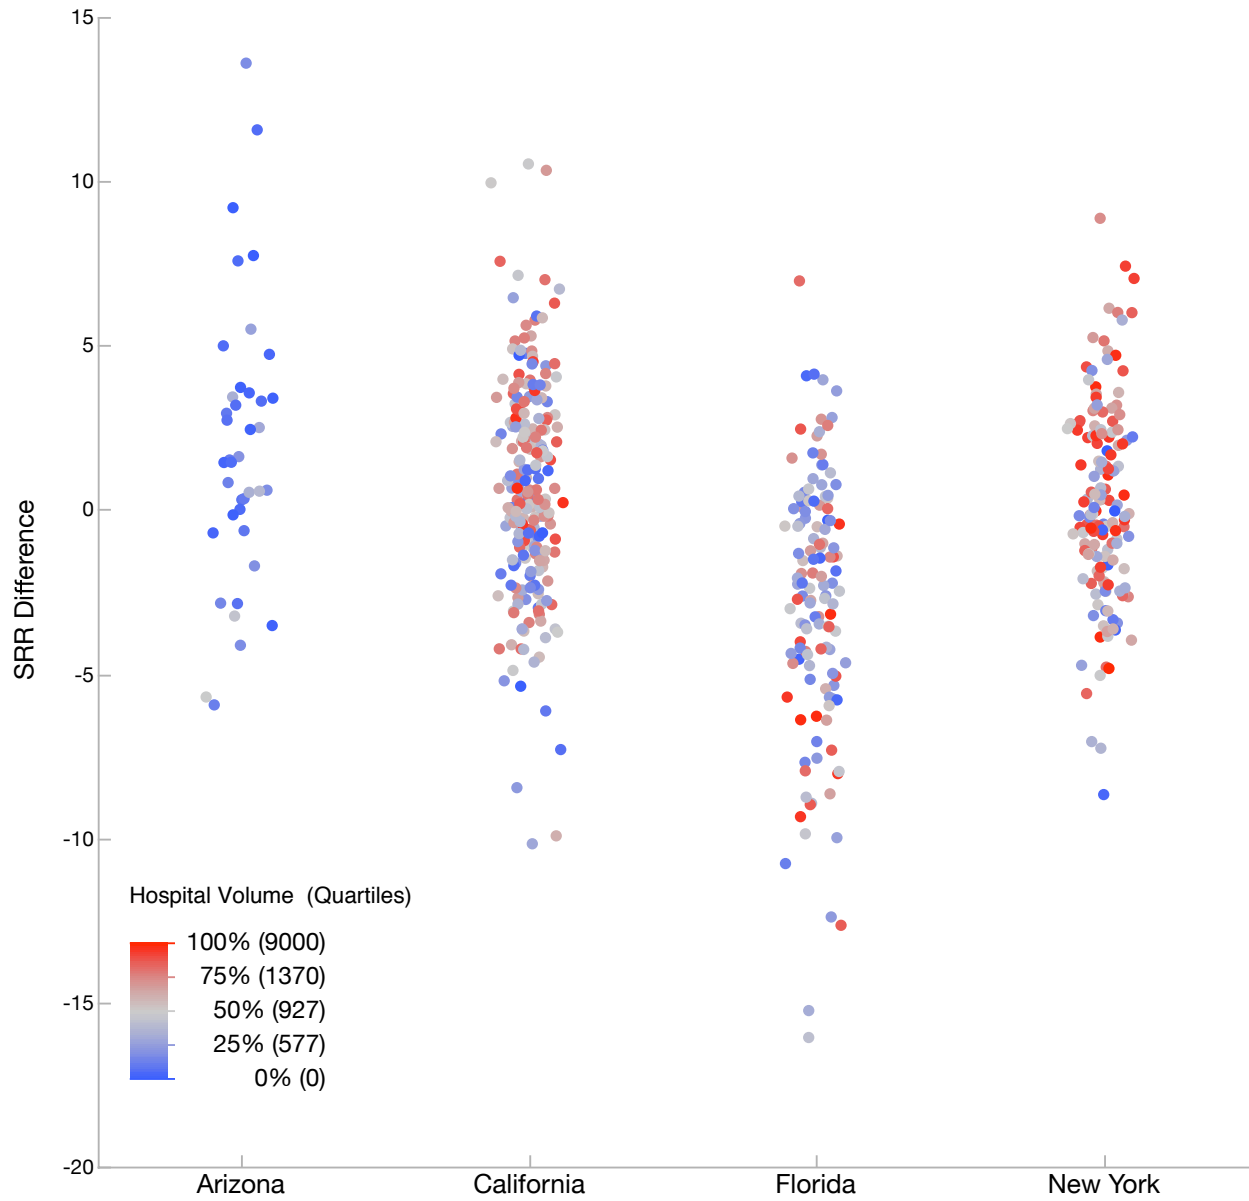

Note: Hospital volume is shown in blue-red color gradient.



**Appendix 7: Hospital-Wide intracluster correlation coefficient estimates at specific readmission intervals from 1 day through 90 days, for base and geodemographic-extended models by hospital subcategory: medicine, surgical/gynecology, cardiorespiratory, cardiovascular, and neurology.**

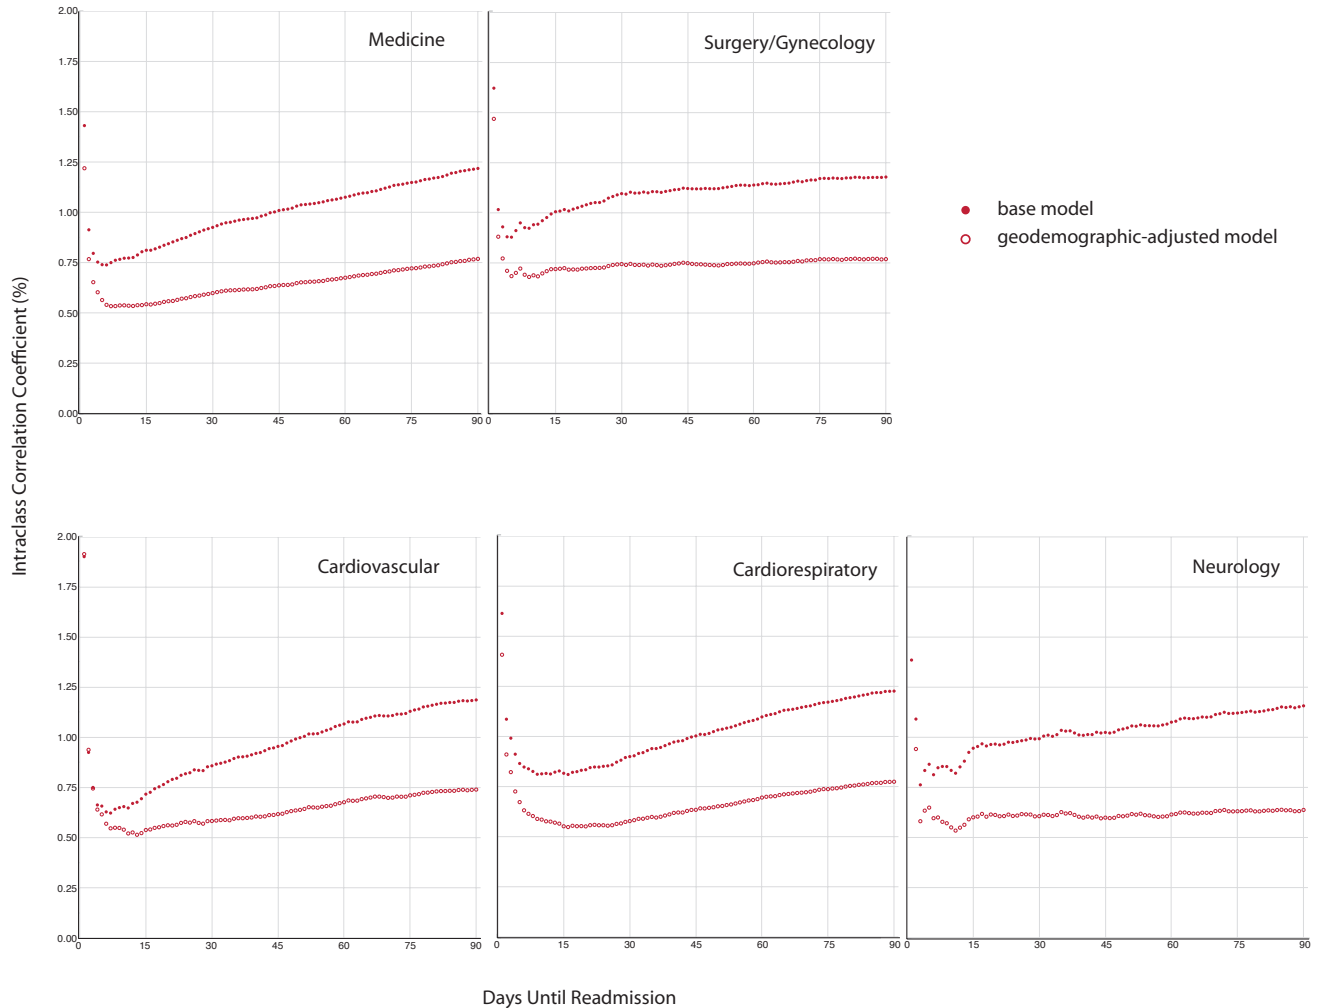

Note: Hospital-Wide intracluster correlation coefficient estimates at specific readmission intervals from 1 day through 90 days, for base and geodemographic-extended models by hospital subcategory: medicine, surgical/gynecology, cardiorespiratory, cardiovascular, and neurology.

Source: Authors' analysis of data from the Healthcare Cost and Utilization Project (HCUP), State Inpatient Database and State Emergency Department Database.

**Appendix 8a: Hospital Performance Rank Change Comparing Readmission Day 7 to 30 for the acute myocardial infarction cohort.**

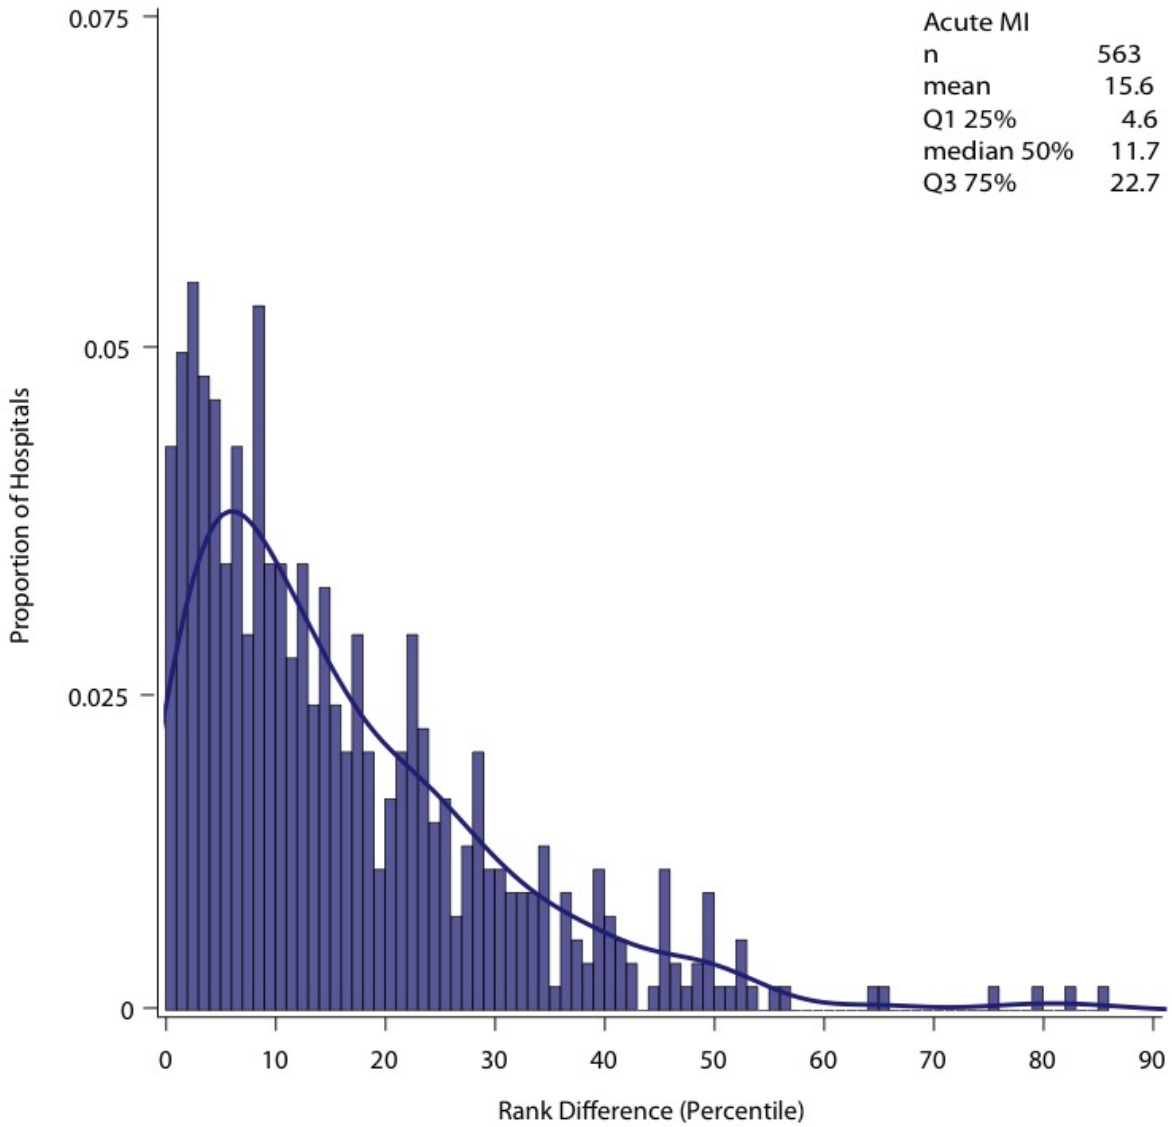

**Appendix 8b: Hospital Performance Rank Change Comparing Readmission Day 7 to 30 for the heart failure cohort.**

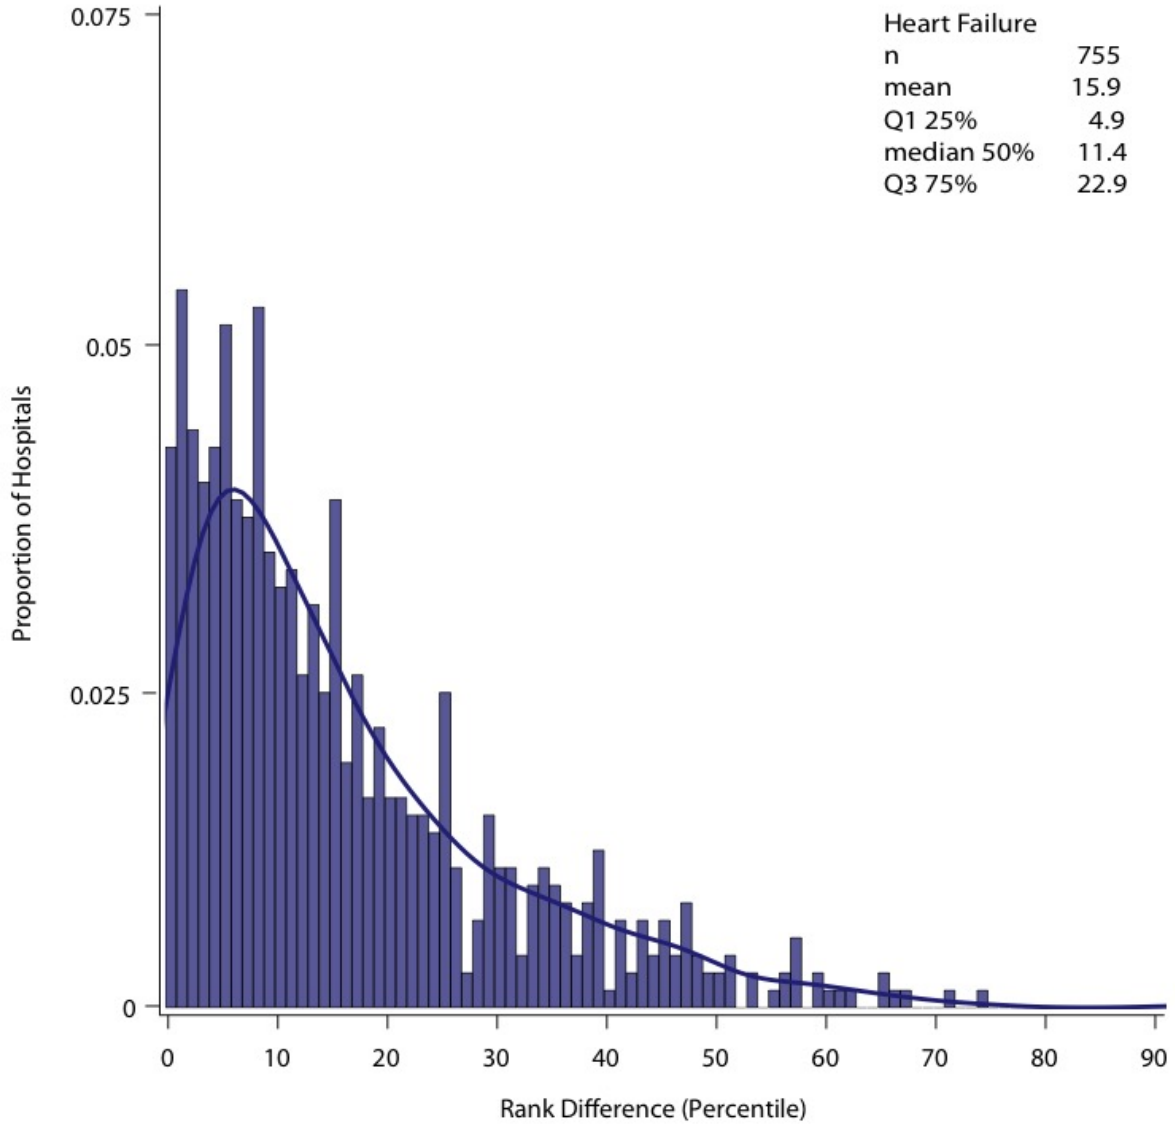

**Appendix 8c: Hospital Performance Rank Change Comparing Readmission Day 7 to 30 for the pneumonia cohort.**

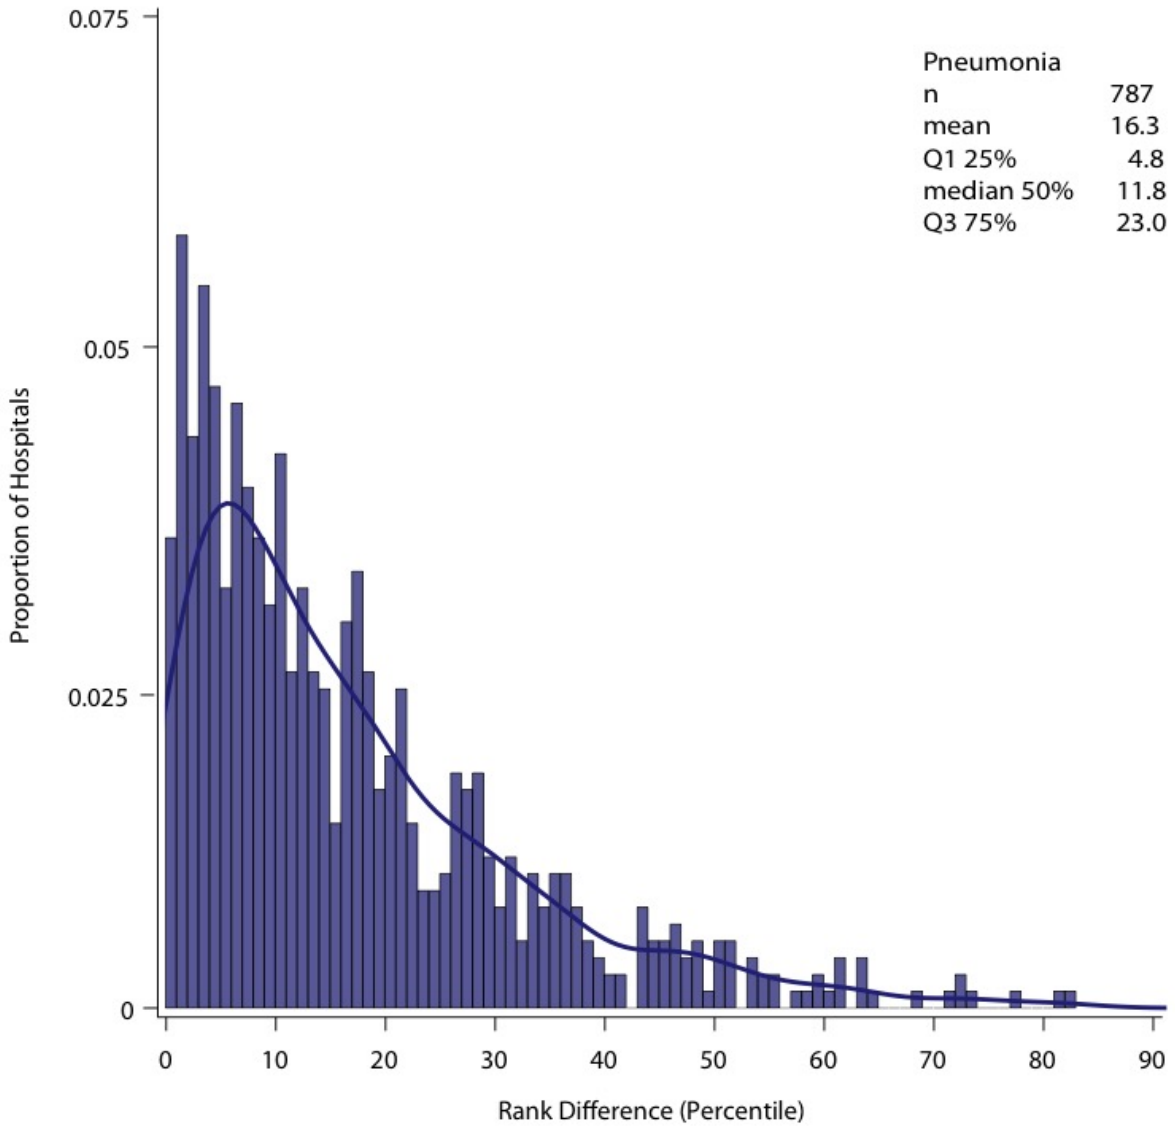

Note: Risk standardized readmission ratios were used to calculate the performance percentile for acute myocardial infarction, heart failure and pneumonia cohorts.

Appendix 9: Pearson correlation between unadjusted hospital readmission rate and length of stay, weighted by facility volume, by readmission cohort: acute myocardial infarction, heart failure, pneumonia, medicine, surgical/gynecology, cardiorespiratory, cardiovascular, and neurology.

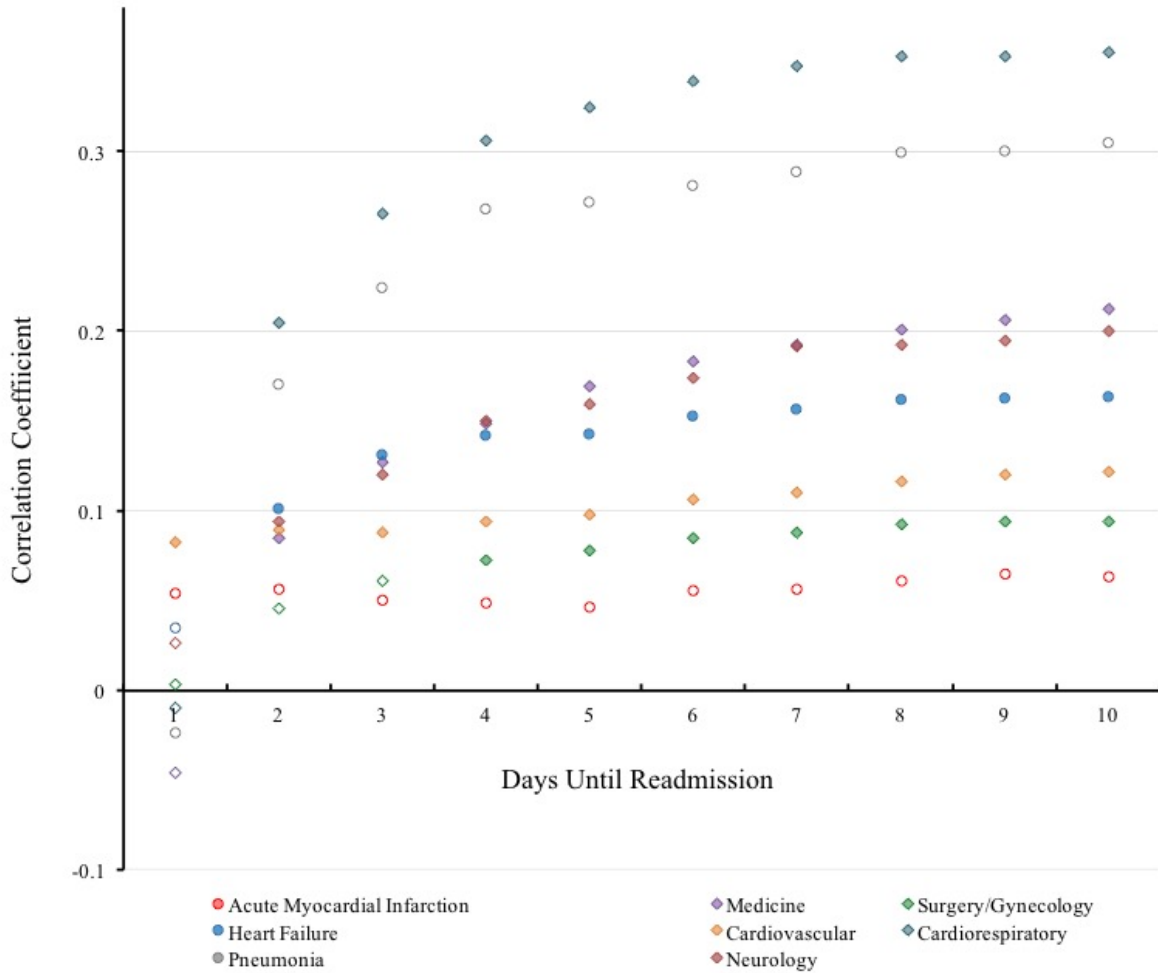

Note: Filled markers indicate  $p < 0.05$ .

**Appendix 10: Agreement between index hospital discharge disposition and subsequent encounter, by readmissions at post-discharge day 1-7, 30 and 1-30 (cumulative).**

| Index Encounter<br>(Discharge Disposition) | Disagreement Between<br>Hospitals |     | Agreement Between<br>Hospitals |      | All Readmissions<br>in Analysis |      |
|--------------------------------------------|-----------------------------------|-----|--------------------------------|------|---------------------------------|------|
|                                            | Not Transferred                   |     | Not Transferred                |      |                                 |      |
| Subsequent Encounter<br>(Admission Source) | Received Transfer In              |     | Received<br>Non-Transfer       |      |                                 |      |
| Day After Discharge                        | n                                 | (%) | n                              | (%)  | N                               | (%)  |
| 1                                          | 3,102                             | 2.6 | 115,980                        | 97.4 | 119,082                         | 0.8  |
| 2                                          | 3,245                             | 2.2 | 143,993                        | 97.8 | 147,238                         | 1.0  |
| 3                                          | 3,189                             | 2.3 | 134,249                        | 97.7 | 137,438                         | 0.9  |
| 4                                          | 2,957                             | 2.3 | 125,693                        | 97.7 | 128,650                         | 0.8  |
| 5                                          | 2,936                             | 2.4 | 118,890                        | 97.6 | 121,826                         | 0.8  |
| 6                                          | 2,887                             | 2.5 | 113,771                        | 97.5 | 116,658                         | 0.8  |
| 7                                          | 2,835                             | 2.5 | 109,486                        | 97.5 | 112,321                         | 0.7  |
| 30                                         | 1,167                             | 2.6 | 44,340                         | 97.4 | 45,507                          | 0.3  |
| 1 to 30                                    | 63,108                            | 2.5 | 2,414,302                      | 97.5 | 2,477,410                       | 16.3 |

**Appendix Notes**

1. Goldstein H, Browne W, Rasbash J. Partitioning variation in multilevel models. *Understanding Statistics: Statistical Issues in Psychology, Education, and the Social Sciences*. 2002;1(4):223-31.
2. Ridout MS, Demétrio CG, Firth D. Estimating intraclass correlation for binary data. *Biometrics*. 1999;55(1):137-48.
3. Feng Z, Grizzle JE. Correlated binomial variates: Properties of estimator of intraclass correlation and its effect on sample size calculation. *Stat Med*. 1992;11(12):1607-14.
